## RESEARCH ARTICLE

## Natural statin derivatives as potential therapy to reduce intestinal fluid loss in cholera

Rattikarn Noitem<sup>1,2</sup>, Pawin Pongkorpsakol<sup>3</sup>, Chartchai Changsen<sup>4</sup>, Yaowapa Sukpondma<sup>5</sup>, Chittreya Tansakul<sup>5</sup>, Vatcharin Rukachaisirikul<sup>5</sup>, Chatchai Muanprasat<sup>2\*</sup>

**1** Program in Translational Medicine, Faculty of Medicine Ramathibodi Hospital, Mahidol University, Ratchathewi, Bangkok, Thailand, **2** Chakri Naruebodindra Medical Institute, Faculty of Medicine Ramathibodi Hospital, Mahidol University, Bang Phli, Samut Prakarn, Thailand, **3** Princess Srisavangavadhana College of Medicine, Chulabhorn Royal Academy, Bangkok, Thailand, **4** Department of Microbiology, Faculty of Science, Mahidol University, Ratchathewi, Bangkok, Thailand, **5** Division of Physical Science and Center of Excellence for Innovation in Chemistry, Faculty of Science, Prince of Songkla University, Hat Yai, Songkhla, Thailand

\* [chatchai.mua@mahidol.ac.th](mailto:chatchai.mua@mahidol.ac.th)

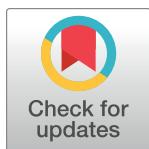

## OPEN ACCESS

**Citation:** Noitem R, Pongkorpsakol P, Changsen C, Sukpondma Y, Tansakul C, Rukachaisirikul V, et al. (2022) Natural statin derivatives as potential therapy to reduce intestinal fluid loss in cholera. *PLoS Negl Trop Dis* 16(12): e0010989. <https://doi.org/10.1371/journal.pntd.0010989>

**Editor:** Jeffrey H. Withey, Wayne State University, UNITED STATES

**Received:** May 26, 2022

**Accepted:** November 28, 2022

**Published:** December 9, 2022

**Copyright:** © 2022 Noitem et al. This is an open access article distributed under the terms of the [Creative Commons Attribution License](https://creativecommons.org/licenses/by/4.0/), which permits unrestricted use, distribution, and reproduction in any medium, provided the original author and source are credited.

**Data Availability Statement:** All relevant data are within the manuscript.

**Funding:** This work was supported by the NSTDA Chair Professor grant (the Fourth Grant) of the Crown Property Bureau and the National Science and Technology Development Agency (V.R and C. M.), Mahidol University (Basic Research Fund: fiscal year 2022, C.M.) and the NSRF via the Program Management Unit for Human Resources & Institutional Development, Research and Innovation (grant number B05F640169, V.R. and

## Abstract

As a leading cause of death in children under 5 years old, secretory diarrheas including cholera are characterized by excessive intestinal fluid secretion driven by enterotoxin-induced cAMP-dependent intestinal chloride transport. This study aimed to identify fungal bioactive metabolites possessing anti-secretory effects against cAMP-dependent chloride secretion in intestinal epithelial cells. Using electrophysiological analyses in human intestinal epithelial (T84) cells, five fungus-derived statin derivatives including  $\alpha$ , $\beta$ -dehydrolovastatin (DHLV),  $\alpha$ , $\beta$ -dehydrodihydromonacolin K, lovastatin, mevastatin and simvastatin were found to inhibit the cAMP-dependent chloride secretion with IC<sub>50</sub> values of 1.8, 8.9, 11.9, 11.4 and 5  $\mu$ M, respectively. Being the most potent statin derivatives, DHLV was evaluated for its pharmacological properties including cellular toxicity, mechanism of action, target specificity and *in vivo* efficacy. DHLV at concentrations up to 20  $\mu$ M did not affect cell viability and barrier integrity of T84 cells. Electrophysiological analyses indicated that DHLV inhibited cystic fibrosis transmembrane conductance regulator (CFTR), a cAMP-dependent apical chloride channel, via mechanisms not involving alteration of intracellular cAMP levels or its negative regulators including AMP-activated protein kinases and protein phosphatases. DHLV had no effect on Na<sup>+</sup>-K<sup>+</sup> ATPase activities but inhibited Ca<sup>2+</sup>-dependent chloride secretion without affecting intracellular Ca<sup>2+</sup> levels. Importantly, intraperitoneal (2 mg/kg) and intraluminal (20  $\mu$ M) injections of DHLV reduced cholera toxin-induced intestinal fluid secretion in mice by 59% and 65%, respectively without affecting baseline intestinal fluid transport. This study identifies natural statin derivatives as novel natural product-derived CFTR inhibitors, which may be beneficial in the treatment of enterotoxin-induced secretory diarrheas including cholera.

C.M.). The funders had no role in study design, data collection and analysis, decision to publish, or preparation of the manuscript.

**Competing interests:** The authors have declared that no competing interests exist.

## Author summary

Secretory diarrheas including cholera are an important global health problem requiring new therapeutic approaches to reduce associated morbidity and mortality. In this study, we discovered that several natural statin derivatives including lipid-lowering agents inhibited cAMP-dependent chloride secretion with  $\alpha,\beta$ -dehydrolovastatin (DHLV) isolated from the soil-derived fungus *Aspergillus sclerotiorum* PSU-RSPG178 being the most potent compound. DHLV inhibited CFTR chloride channels via mechanisms not involving alteration of intracellular cAMP levels or activation of negative regulators of CFTR functions. Furthermore, DHLV was non-toxic to intestinal epithelial cells and had no effect on  $\text{Na}^+/\text{K}^+$  ATPase activities. *In vivo* administration of DHLV suppressed intestinal fluid secretion in a mouse closed loop model of cholera. Natural statins represent a promising class of compound candidates for the development of anti-secretory therapy of cholera.

## 1. Introduction

Secretory diarrhea is one of the major causes of morbidity and mortality especially in developing countries with the estimated number of 1.6 million deaths annually. It is considered as a third leading cause of death in children under 5 years of age [1]. The common etiologies of secretory diarrheas are intestinal infections with pathogens that produce enterotoxins capable of inducing  $\text{Cl}^-$ -driven intestinal fluid secretion [2]. Mainstay therapy of secretory diarrheas is the use of oral rehydration solution (ORS), which replaces fluid loss without affecting severity of diarrheas making it ineffective in patients with severe diarrheas [3,4]. Therefore, there is a need to develop anti-secretory therapy that targets molecular mechanisms determining severity of secretory diarrheas especially ion transport in enterocytes [5].

Ion transport in enterocytes is mediated by several transport proteins and under the direction of net absorption [6]. Increased transepithelial  $\text{Cl}^-$  secretion provides a driving force for basolateral-to-apical fluid transport into the intestinal lumen via paracellular pathways leading to net fluid secretion and secretory diarrheas [6]. The cystic fibrosis transmembrane conductance regulator (CFTR), a cAMP-dependent  $\text{Cl}^-$  channel localized to the luminal membrane of enterocytes, is proposed as a promising therapeutic target for secretory diarrheas [7,8]. The CFTR-mediated  $\text{Cl}^-$  secretion is achieved through cooperative functions of the  $\text{Na}^+/\text{K}^+/\text{2Cl}^-$  cotransporters (NKCC1) for uptake of  $\text{Cl}^-$  into enterocytes, and  $\text{Na}^+/\text{K}^+$  ATPase and basolateral cAMP-activated  $\text{K}^+$  channel (KCNQ1/KCNE3) for sustaining its electrochemical driving force [6,9–11]. Apart from CFTR,  $\text{Ca}^{2+}$ -activated  $\text{Cl}^-$  channels (CaCCs) expressed on apical membrane of enterocytes contribute to the pathogenesis of secretory diarrheas especially those involving elevation of intracellular  $\text{Ca}^{2+}$  such as rotavirus infection [5].

Natural compounds represent a great source of chemicals for identifying potential drug candidates [12]. To date, several CFTR inhibitors have been identified from natural products including plant-derived compounds e.g. xanthenes, tannins, flavonoids, chalcones, and piperine, and fungus-derived compounds e.g. zearalenone and arthropsole A [13–19]. During the last two decades, thousands of microbe-derived bioactive compounds were mostly isolated from fungi [20,21]. Many primary and secondary metabolites produced from soil fungi serve as potential sources of pharmaceutical products, for example, alkaloids, pigments, antibiotics, enzymes, value-added dairy products, and lipid-lowering statins [22]. One of the promising approaches for drug discovery for neglected diseases is drug repurposing. Statins, FDA-

approval drugs used for the treatment of dyslipidemia, are originally isolated from fungi. This study was aimed to identify new candidate anti-diarrheal agents from the collection of metabolites from soil fungi and characterize their cellular mechanisms, potential toxicity and anti-diarrheal efficacy using both *in vitro* and *in vivo* models.

## 2. Materials and methods

### 2.1 Ethics statement

All animal experiments were approved by the Institutional Animal Care and Use Committee of the Faculty of Science, Mahidol University (permit number MUSC63-007-515), which have been conducted in accordance with the Guide for the Care and Use of Laboratory Animals of the National Institutes of Health, U.S.A.

### 2.2 Materials

$\alpha,\beta$ -dehydrolovastatin (DHLV) and its derivatives, lovastatin and  $\alpha,\beta$ -dehydrodihydromonacolin K, were produced by the soil-derived fungus *Aspergillus sclerotiorum* PSU-RSPG178, which was deposited as BCC56851 at BIOTEC Culture collection, National Center for Genetic Engineering and Biotechnology (BIOTEC), Thailand [23]. Mevastatin, pravastatin, and simvastatin (Cat# M2537, P4498, and S6196) were purchased from Sigma-Aldrich (St. Louis, MO, USA). Dulbecco's Modified Eagle Medium/Nutrient Mixture F-12 (DMEM-F12; Cat#12400-024), fetal bovine serum (FBS; Cat#10270-106), trypsin-EDTA (Cat#25300-062), penicillin/streptomycin (Cat#15140-122) were purchased from Thermo Fisher Scientific Inc. (Waltham, MA, USA). Cholera toxin (CT; Cat#10654, Lot#10067A1) was obtained from List Biological Laboratories, Inc. (Campbell, CA, USA). Heat-stable toxin (STa; Product no.4044297, Lot#1000007536) was purchased from Bachem (Torrance, CA, USA). Dorsomorphin or Compound C (AMPK inhibitor; Cat#P5499), CPT-cAMP (Cat#C3912), genistein (Cat#C6649), ATP (Cat#A5394), forskolin (Cat#F6886),  $\text{Na}_3\text{VO}_4$  (Cat#S6508), CFTR<sub>inh</sub>-172 (Cat#C2992), IBMX (phosphodiesterase (PDE) inhibitor; Cat#I5879), Ouabain (Cat#O3125) were purchased from Sigma-Aldrich (St. Louis, MO, USA). MK571 (Cat# 70720) was purchased from Cayman Chemical (Michigan, USA). Other chemicals were purchased from Merck Millipore (Burlington, MA, USA).

### 2.3 Cell culture

T84 cells were purchased from the American Type Culture Collection (Manassas, VA, USA). The culture medium for this cell line was DMEM-F12 supplemented with 10% FBS and 100 U/mL penicillin, and 100  $\mu\text{g}/\text{mL}$  streptomycin. T84 cells were cultured at 37°C in a humidified incubator under an atmosphere of 95%  $\text{O}_2$ /5%  $\text{CO}_2$ .

### 2.4 Cell viability assays

The cytotoxic effect of DHLV was evaluated by the 3-(4,5-dimethyl-2-thiazolyl)-2,5-diphenyl-2H-tetrazolium bromide (MTT) assays as described previously [24]. Briefly, T84 cells were seeded ( $1 \times 10^5$  cells/well) and cultured for 24 h on 96-well plates, followed by treatment for 6 h or 24 h with serum free culture media containing DMSO as a vehicle control or DHLV at various concentrations. MTT reagent (5 mg/mL) was added into 96-well plates containing T84 cells and incubated for 4 h at 37°C. DMSO (100  $\mu\text{L}$ ) was added into each well to stop MTT reaction. An absorbance at 540 nm was detected using a spectrophotometer.

## 2.5 Barrier function measurements

Evaluation of the barrier function of intestinal epithelial cell monolayers was performed by measuring the transepithelial electrical resistance (TER) using an epithelial volt-ohm meter (World Precision Instruments, Sarasota, Florida, USA) and permeability assays. In brief, T84 cells were seeded ( $5 \times 10^5$  cells/well) on Transwell permeable support (Cat#3460; Costar, Cambridge, MA, USA) and cultured for 10 days, when TER was more than  $1,000 \Omega \text{ cm}^2$ . The *in vitro* permeability assay was performed using fluorescein isothiocyanate (FITC)-labeled dextran (molecular weight of  $\sim 4$  kDa). T84 cell monolayers were treated for 6 h with vehicle (DMSO), DHLV ( $0.5 \mu\text{M}$ – $50 \mu\text{M}$ ), or EGTA (positive control; 3 mM). Then, FITC-dextran was added to the apical chamber at the final concentration of 1 mg/mL. An hour later, the basolateral media were collected for measurement of fluorescence intensity (excitation wavelengths of 485 nm and emission wavelengths of 530 nm) using the multi-mode microplate reader (Biotek, Life Science, Inc., USA). FITC-dextran concentrations were calculated using the standard curve of fluorescence intensity at various FITC-dextran concentrations [25].

## 2.6 Electrophysiological analyses

T84 cells were seeded ( $5 \times 10^5$  cells/well) on Snapwell inserts (Cat#3801; Corning, Inc., 0.4  $\mu\text{m}$  pore polyester membrane) and cultured for 10 days (TER  $> 1,000 \Omega \text{ cm}^2$ ). Snapwell inserts containing T84 cell monolayers were mounted in Ussing chambers filled with Krebs's solution (pH 7.4) containing 120 mM NaCl, 25 mM  $\text{NaHCO}_3$ , 3.3 mM  $\text{KH}_2\text{PO}_4$ , 0.8 mM  $\text{K}_2\text{HPO}_4$ , 1.2 mM  $\text{MgCl}_2$ , 1.2 mM  $\text{CaCl}_2$ , and 10 mM glucose. For apical  $\text{Cl}^-$  current analyses,  $\text{Cl}^-$  gradient solutions were used to create the basolateral-to-apical  $\text{Cl}^-$  gradient. The basolateral high  $\text{Cl}^-$  solution contained 130 mM NaCl, 2.7 mM KCl, 1.5 mM  $\text{KH}_2\text{PO}_4$ , 1 mM  $\text{CaCl}_2$ , 0.5 mM  $\text{MgCl}_2$ , 10 mM HEPES (pH 7.4), and 10 mM glucose. The apical low  $\text{Cl}^-$  solution contained 65 mM NaCl were replaced with 65 mM of Na gluconate and the concentration of  $\text{CaCl}_2$  was increased to 2 mM. Basolateral membrane permeabilization was done by pre-incubation with amphotericin B (250  $\mu\text{g}/\text{mL}$ ) for 30 min. The  $I_{\text{SC}}$  and apical  $I_{\text{Cl}^-}$  were measured using DVC-1000 voltage-clamp (World Precision Instruments, USA and Physiologic Instruments, USA) with Ag/AgCl electrodes and 3 M KCl agar bridges.

## 2.7 Intracellular cAMP measurement

Intracellular cAMP levels were measured using the cAMP Parameter Assay Kit (Cat# KGE002B, R&D Systems, Minneapolis, Minnesota, USA). T84 cells were seeded ( $1 \times 10^6$  cells/well) on 24-well plates (Cat#3524, Corning, Inc.) and cultured for 24 h. Then, cells were washed with PBS for 3 times followed by 1-h treatment with DMSO (vehicle), DHLV (20  $\mu\text{M}$ ), forskolin (20  $\mu\text{M}$ ), or forskolin (20  $\mu\text{M}$ ) plus DHLV (20  $\mu\text{M}$ ) before washing with cold phosphate-buffered saline (PBS) and lysis with cell lysis buffers. Intracellular cAMP was competed with horseradish peroxidase (HRP)-cAMP conjugate for binding on anti-cAMP antibodies. The optical density (O.D.) were measured using the multi-mode microplate reader (Biotek, Life Science, Inc., USA). Intracellular cAMP levels were calculated using a standard curve of standard cAMP levels.

## 2.8 Intracellular calcium measurement

Intracellular  $\text{Ca}^{2+}$  levels were measured using the Fluo-8 Calcium Flux Assay Kit (Cat#ab112129, Abcam plc, CB2, 0AX, UK). T84 cells were seeded ( $1 \times 10^5$  cells/well) and cultured for 24 h on 96-black well plates before incubation with Fluo-8 dye-loading solution at  $37^\circ\text{C}$  for 30 min and room temperature for 30 min. Cells were then incubated with DMSO

(vehicle) or 20  $\mu\text{M}$  of DHLV, followed by fluorescence intensity measurement (excitation wavelengths of 490 nm and emission wavelengths of 525 nm) using the multi-mode microplate reader (Biotek, Life Science, Inc., USA).

## 2.9 Mouse closed-loop models of cholera toxin (CT)-induced diarrheas

ICR mice (30–35 g) were purchased from Nomura Siam International Co., Ltd., Thailand. Mice were acclimated under controlled conditions for 3 days (temperature  $22 \pm 1^\circ\text{C}$ ; relative humidity 30–70%; 12-h dark/light cycle) with access to food and water ad libitum. To investigate the *in vivo* efficacy of DHLV on CT-induced intestinal fluid secretion, mice were fasted for 24 h before experiments. Mice were anesthetized with an intraperitoneal injection of thiopental (50 mg/kg), abdominal incision was made, and ileal closed-loops (length of 2–3 cm) were created by ligation. For intestinal fluid secretion, ileal closed-loops were instilled with 100  $\mu\text{l}$  of sterile PBS containing CT (1  $\mu\text{g}/\text{loop}$ ) with or without intraluminal (i.l.) or intraperitoneal (i.p.) administration of DHLV (20  $\mu\text{M}$  and 2 mg/kg, respectively). The abdominal incision was closed by sutures and mice were allowed to recover from anesthesia. Six hours later, mice were euthanized and ileal closed-loops were collected. Weight/length ratios of ileal closed-loops, which indicated intestinal fluid secretion, were measured. For baseline intestinal fluid transport, ileal closed-loops were instilled with 200  $\mu\text{l}$  of PBS with or without DHLV (20  $\mu\text{M}$ ). One and thirty min later, mice were euthanized by intraperitoneal injection of overdose of thiopental (150 mg/kg) and ileal closed-loops were collected and measured for weight/length ratios. Mice were euthanized with an injection of thiopental (150 mg/kg).

## 2.10 Statistical analysis

All results are expressed as mean  $\pm$  S.E.M. Statistical analyses between two groups were performed using Student's *t*-test. One-way ANOVA was used to compare the difference between three or more groups followed by Bonferroni's post hoc test. A *p*-value of  $<0.05$  was considered statistically significant.

## 3. Results

### 3.1 Discovery of $\alpha,\beta$ -dehydrolovastatin (DHLV) as an inhibitor of cAMP-dependent $\text{Cl}^-$ secretion in T84 cells

To identify inhibitors of cAMP-dependent intestinal  $\text{Cl}^-$  secretion, effects of forty metabolites (5  $\mu\text{M}$ ) derived from soil fungi on short-circuit current ( $I_{\text{SC}}$ ) induced by forskolin (an adenylate cyclase activator) were investigated in T84 cell monolayers [18]. Three statin derivatives isolated from the soil-derived fungus *Aspergillus sclerotiorum* PSU-RSPG178 including  $\alpha,\beta$ -dehydrolovastatin (DHLV), lovastatin, and  $\alpha,\beta$ -dehydrodihydromonacolin K (Fig 1) were active in our assays. Concentration-dependent effects of the three compounds added into both apical and basolateral sides were performed, revealing  $\text{IC}_{50}$  values of  $1.78 \pm 0.17 \mu\text{M}$ ,  $11.91 \pm 1.45 \mu\text{M}$  and  $8.89 \pm 1.03 \mu\text{M}$ , respectively (Fig 2) with maximal inhibitory effects being observed at concentration of 20  $\mu\text{M}$  to 40  $\mu\text{M}$ . Since these compounds shared core chemical structures with the cholesterol-lowering statin drugs, we asked whether other statin drugs (i.e. simvastatin, pravastatin and mevastatin; structures shown in Fig 1) would have inhibitory effects on cAMP-dependent  $\text{Cl}^-$  secretion. We found that simvastatin and mevastatin inhibited cAMP-dependent  $\text{Cl}^-$  secretion with  $\text{IC}_{50}$  values of  $5.03 \pm 0.47 \mu\text{M}$  and  $11.39 \pm 1.61 \mu\text{M}$ , respectively (Fig 2A and 2C). In contrast, pravastatin at concentrations between 1  $\mu\text{M}$  to 20  $\mu\text{M}$  did not affect cAMP-dependent  $\text{Cl}^-$  secretion. These data indicate that DHLV is more potent than the tested statin drugs and others and less potent than a reference CFTR inhibitor

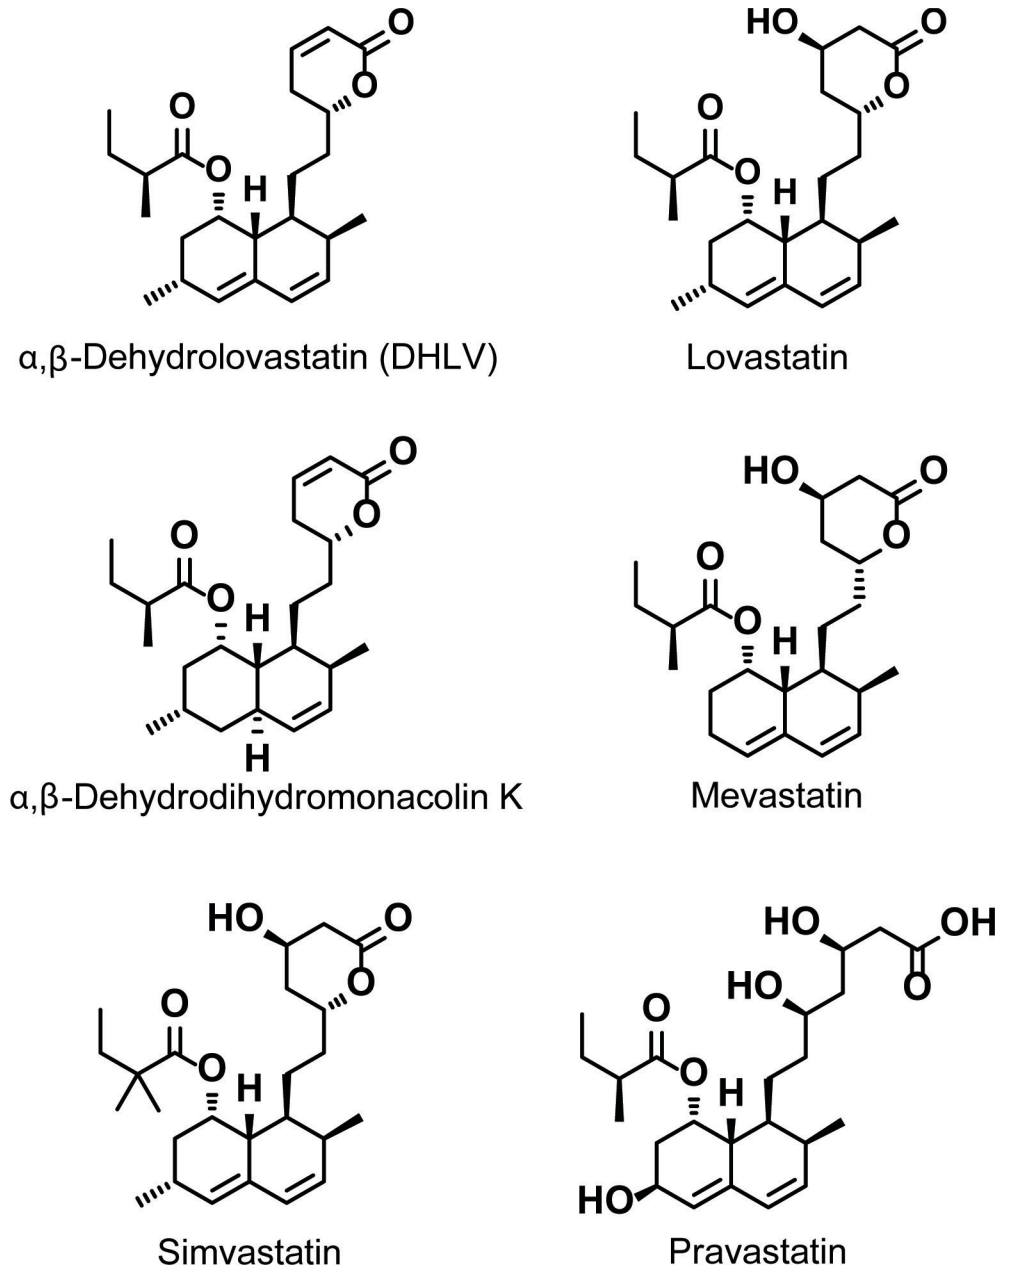

**Fig 1. Chemical structures of  $\alpha,\beta$ -dehydrolovastatin (DHLV), lovastatin,  $\alpha,\beta$ -dehydrodihydromonacolin K, mevastatin, simvastatin, and pravastatin.**

<https://doi.org/10.1371/journal.pntd.0010989.g001>

CFTR<sub>inh</sub>-172 (IC<sub>50</sub> = ~0.2  $\mu$ M, Fig 2B) in inhibiting cAMP-dependent Cl<sup>-</sup> secretion in T84 cells. Therefore, subsequent investigations were performed to evaluate pharmacological properties of DHLV including polarity of effects, potential cytotoxicity, mechanism of actions and anti-diarrheal efficacy.

### 3.2 Polarity of inhibition and cytotoxic effects of DHLV

To investigate the polarity of DHLV inhibition of cAMP-dependent Cl<sup>-</sup> secretion, effects of DHLV added into apical vs basolateral solutions were compared. DHLV was tested at a

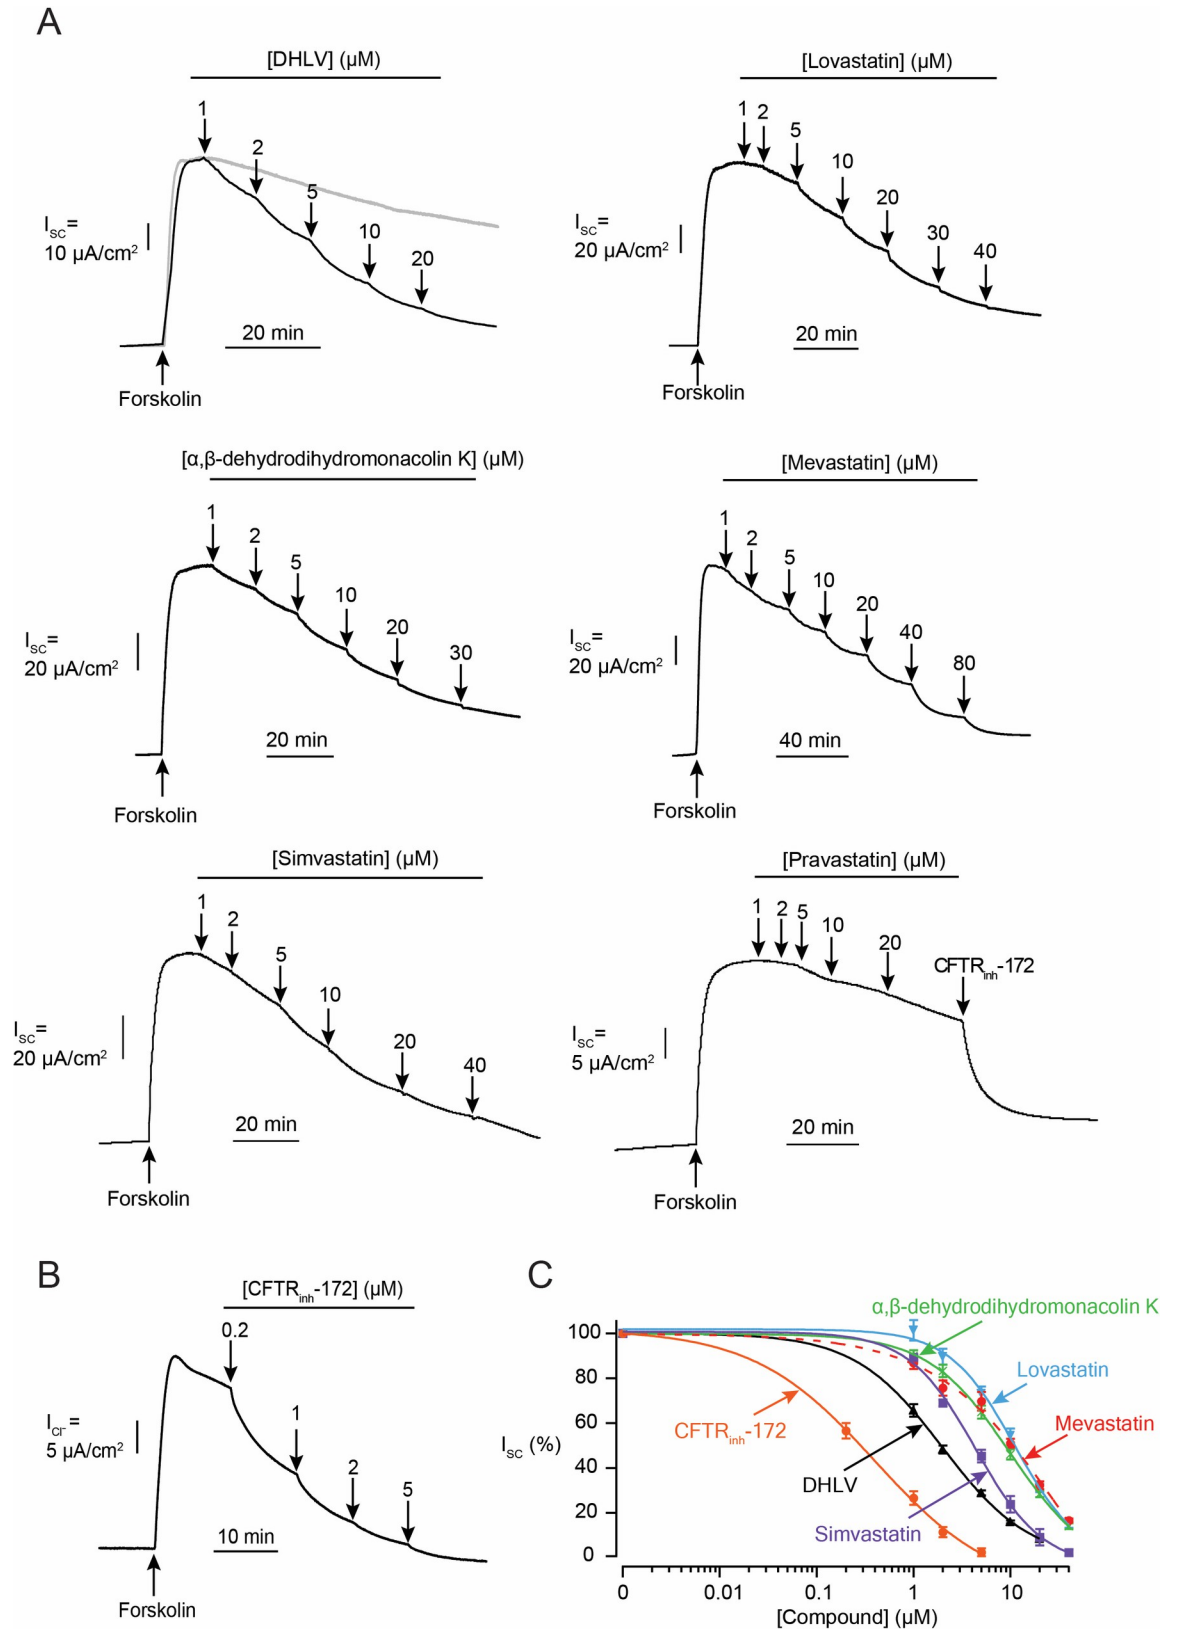

**Fig 2. Effect of statin derivatives isolated from soil fungus *Aspergillus sclerotiorum* and statin drugs on cAMP-dependent Cl<sup>-</sup> secretion in T84 cell monolayers. (A) Effect of  $\alpha, \beta$ -dehydrolovastatin (DHLV), lovastatin,  $\alpha, \beta$ -dehydrodihydromonacolin K,**

mevastatin, simvastatin, and pravastatin on cAMP-dependent  $\text{Cl}^-$  secretion determined by  $I_{\text{SC}}$  analysis. (B) Effect of CFTR<sub>inh</sub>-172 (CFTR inhibitor) on cAMP-dependent  $\text{Cl}^-$  secretion determined by  $I_{\text{SC}}$  analysis. All of compounds were added accumulatively in both apical and basolateral solutions at the indicated concentrations. Representative  $I_{\text{SC}}$  tracings are shown. (C) Summary of concentration-inhibition studies. Data are fitted to Hill's equation and expressed as means of % forskolin-stimulated  $I_{\text{SC}} \pm \text{S.E.M.}$  ( $n = 3-7$ ).

<https://doi.org/10.1371/journal.pntd.0010989.g002>

concentration of 20  $\mu\text{M}$ , which was found to inhibit cAMP-dependent  $\text{Cl}^-$  secretion by  $\sim 95\%$  in the concentration-response studies. As depicted in Fig 3A, basolateral addition of DHLV (20  $\mu\text{M}$ ) diminished cAMP-dependent  $\text{Cl}^-$  secretion by  $\sim 57.32\%$  in intact T84 cells. On the other hand, apical addition of DHLV produced  $\sim 89.1\%$  inhibition of cAMP-dependent  $\text{Cl}^-$  secretion, which was significantly higher than that produced by basolateral addition of DHLV. These results indicate that DHLV preferentially acts on apical membrane.

Next, the reversibility of the inhibitory effect of DHLV was determined. As shown in Fig 3B, removal of DHLV (2  $\mu\text{M}$ ) from the bathing solutions resulted in  $\sim 60\%$  reversal of the cAMP-dependent  $\text{Cl}^-$  secretion. Of note, the recovered cAMP-dependent  $\text{Cl}^-$  current was inhibited by CFTR<sub>inh</sub>-172, confirming that the recovered current was mainly mediated by CFTR. This result indicates that the inhibitory effect of DHLV on cAMP-dependent  $\text{Cl}^-$  secretion is reversible.

To examine the potential cytotoxic effects of DHLV in T84 cells, MTT cell viability assays and fluorescein isothiocyanate (FITC)-dextran (molecular weight of 4 kDa) permeability assays were performed. Exposure of T84 cells to DHLV (up to 20  $\mu\text{M}$ ) for 6 h (exposure time of *in vivo* studies) or 24 h did not affect cell viability of T84 cells as measured by MTT assays (Fig 3C). Similarly, DHLV at concentrations up to 50  $\mu\text{M}$  (6 h of incubation) had no effect on FITC-dextran flux (Fig 3D), indicating that DHLV had no effect on barrier integrity in T84 cell monolayers. These results indicate that DHLV has no potential cytotoxic effect in T84 cells.

### 3.3 Mechanism of DHLV on the inhibition of cAMP-dependent $\text{Cl}^-$ secretion

To scrutinize whether DHLV inhibited the CFTR  $\text{Cl}^-$  transport activity, apical  $\text{Cl}^-$  current ( $I_{\text{Cl}}$ ) analysis was performed. In this experiment, basolateral membrane of T84 cell monolayers was permeabilized by amphotericin B (250  $\mu\text{g}/\text{mL}$ ) and buffers with asymmetrical  $\text{Cl}^-$  concentrations were used to establish a basolateral-to-apical  $\text{Cl}^-$  gradient (Fig 4A). Using forskolin as a CFTR stimulator, DHLV concentration-dependently inhibited the CFTR-mediated apical  $I_{\text{Cl}}$  with an  $\text{IC}_{50}$  value of  $2.10 \pm 0.25 \mu\text{M}$  and  $>95\%$  inhibition being observed at a concentration of 20  $\mu\text{M}$  (Fig 4B and 4C). Interestingly, we found that DHLV inhibited apical  $I_{\text{Cl}}$  induced by genistein (a direct activator of CFTR) with an  $\text{IC}_{50}$  value of  $9.92 \pm 1.86 \mu\text{M}$ , which was significantly higher than that obtained from experiments using forskolin (an indirect activator of CFTR) as a stimulator of CFTR-mediated apical  $I_{\text{Cl}}$  (Fig 4B and 4C).

Next, we determined if DHLV inhibited the CFTR-mediated apical  $I_{\text{Cl}}$  by modulating intracellular cAMP metabolism. We found that DHLV suppressed the CFTR-mediated apical  $I_{\text{Cl}}$  induced by CPT-cAMP (a non-hydrolysable, cell-permeable cAMP) and a cocktail of forskolin and IBMX with  $\text{IC}_{50}$  values of  $5.50 \pm 0.21 \mu\text{M}$  and  $2.59 \pm 0.36 \mu\text{M}$ , respectively (Fig 4B and 4C). Apart from global cAMP regulation by PDE, multidrug-resistant protein 4 (MRP4)-mediated cAMP efflux controls CFTR activity by modulating local cAMP levels in a compartmentalized manner [26]. To evaluate the role of MRP4 in mediating the inhibitory effect of DHLV on CFTR, T84 cells were pretreated with MK571, an inhibitor of MRP4, before conducting concentration-dependent CFTR inhibition studies of DHLV. In the presence of MK571, we found that DHLV inhibited the forskolin-induced CFTR-mediated apical  $I_{\text{Cl}}$  with

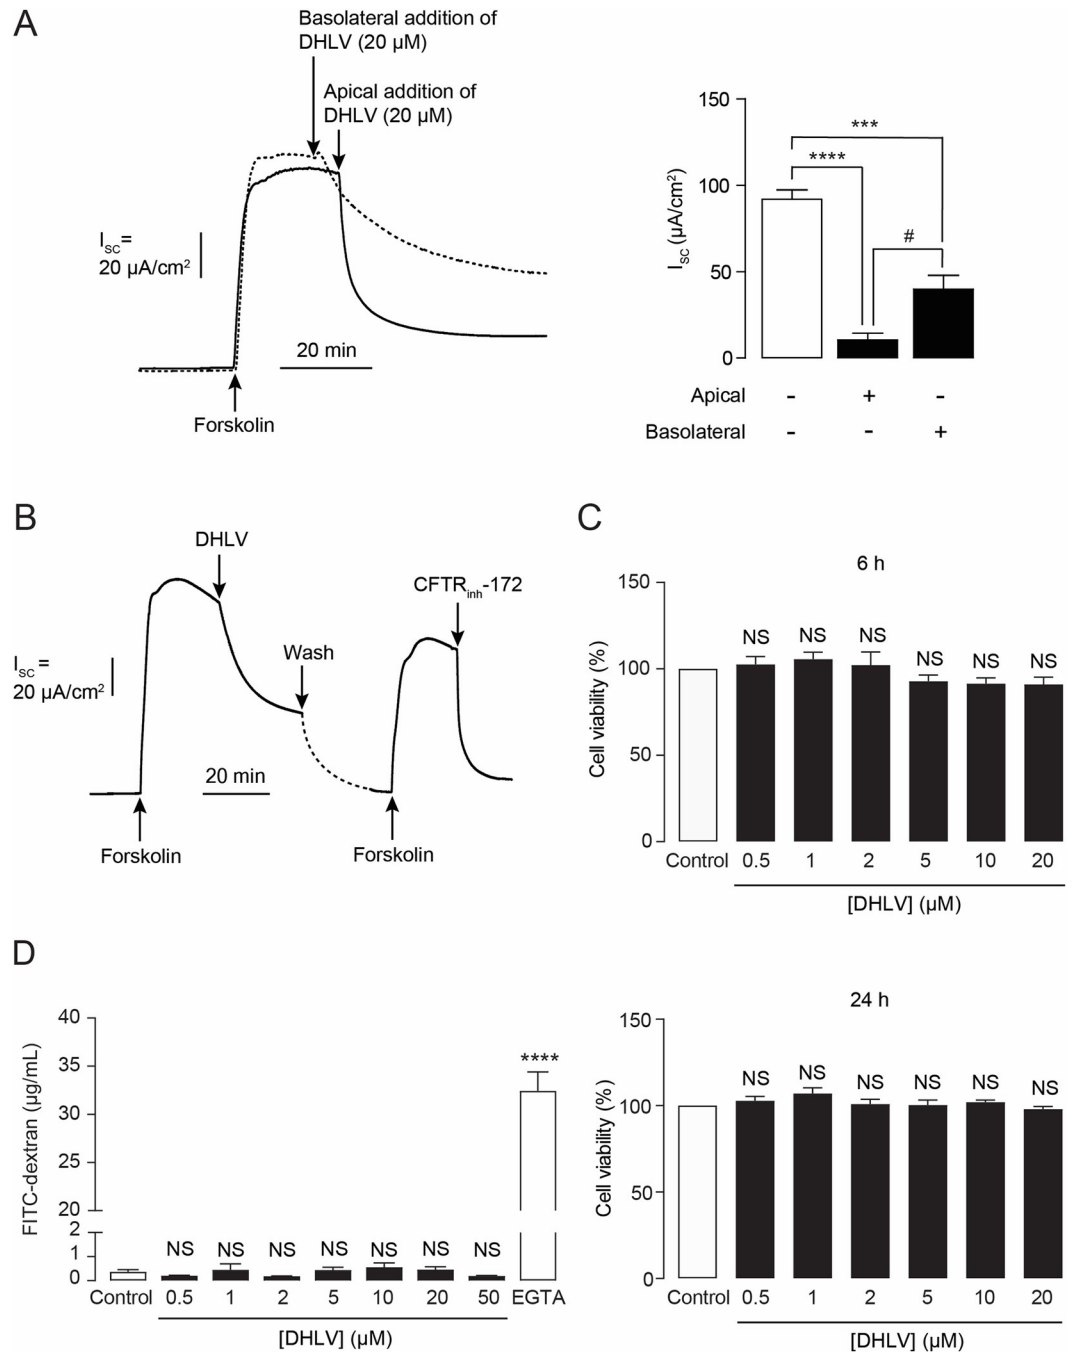

**Fig 3. Effect of  $\alpha,\beta$ -dehydrolovastatin (DHLV) on cAMP-dependent  $Cl^-$  secretion, cell viability and barrier function in T84 cell monolayers.** (A, left) Polarity of inhibition by  $\alpha,\beta$ -dehydrolovastatin (DHLV) on cAMP-dependent  $Cl^-$  secretion determined by  $I_{sc}$  analysis. DHLV (20  $\mu M$ ) was added into apical and basolateral solutions in a separate experiment. Representative  $I_{sc}$  tracings are shown. (A, right) Summary of the data expressed as mean of  $I_{sc} \pm S.E.M.$  ( $n = 5$ ). (B) Reversibility of inhibition of CFTR-mediated  $Cl^-$  secretion by DHLV (2  $\mu M$ ) in T84 cell monolayers. After the inhibition of CFTR-mediated  $Cl^-$  secretion was stabilized, the bathing solution containing forskolin and DHLV was removed. Both chambers were gently washed 5 times and bathing solution containing forskolin were re-filled into the chamber. At the end of experiment, CFTR<sub>inh</sub>-172 (20  $\mu M$ ) was added into the apical chamber. A representative tracing of 3 independent experiments is shown ( $n = 3$ ) (C) Effect of DHLV on cell viability evaluated by MTT assays. T84 cells were treated with DHLV at the indicated concentrations for 6 or 24 h (upper, lower). Data are expressed as % of cell viability compared to control  $\pm S.E.M.$  ( $n = 4-6$ ). (D) Effect of DHLV on intestinal barrier function. FITC-dextran flux assays were performed after 6 h of incubation with DHLV (20  $\mu M$ ). EGTA (3 mM) was used as a positive control. Data are expressed as concentration of FITC-dextran  $\pm S.E.M.$  ( $n = 5-6$ ). NS, non-significant; \*\*\*\*  $p < 0.0001$  compared with control.

<https://doi.org/10.1371/journal.pntd.0010989.g003>

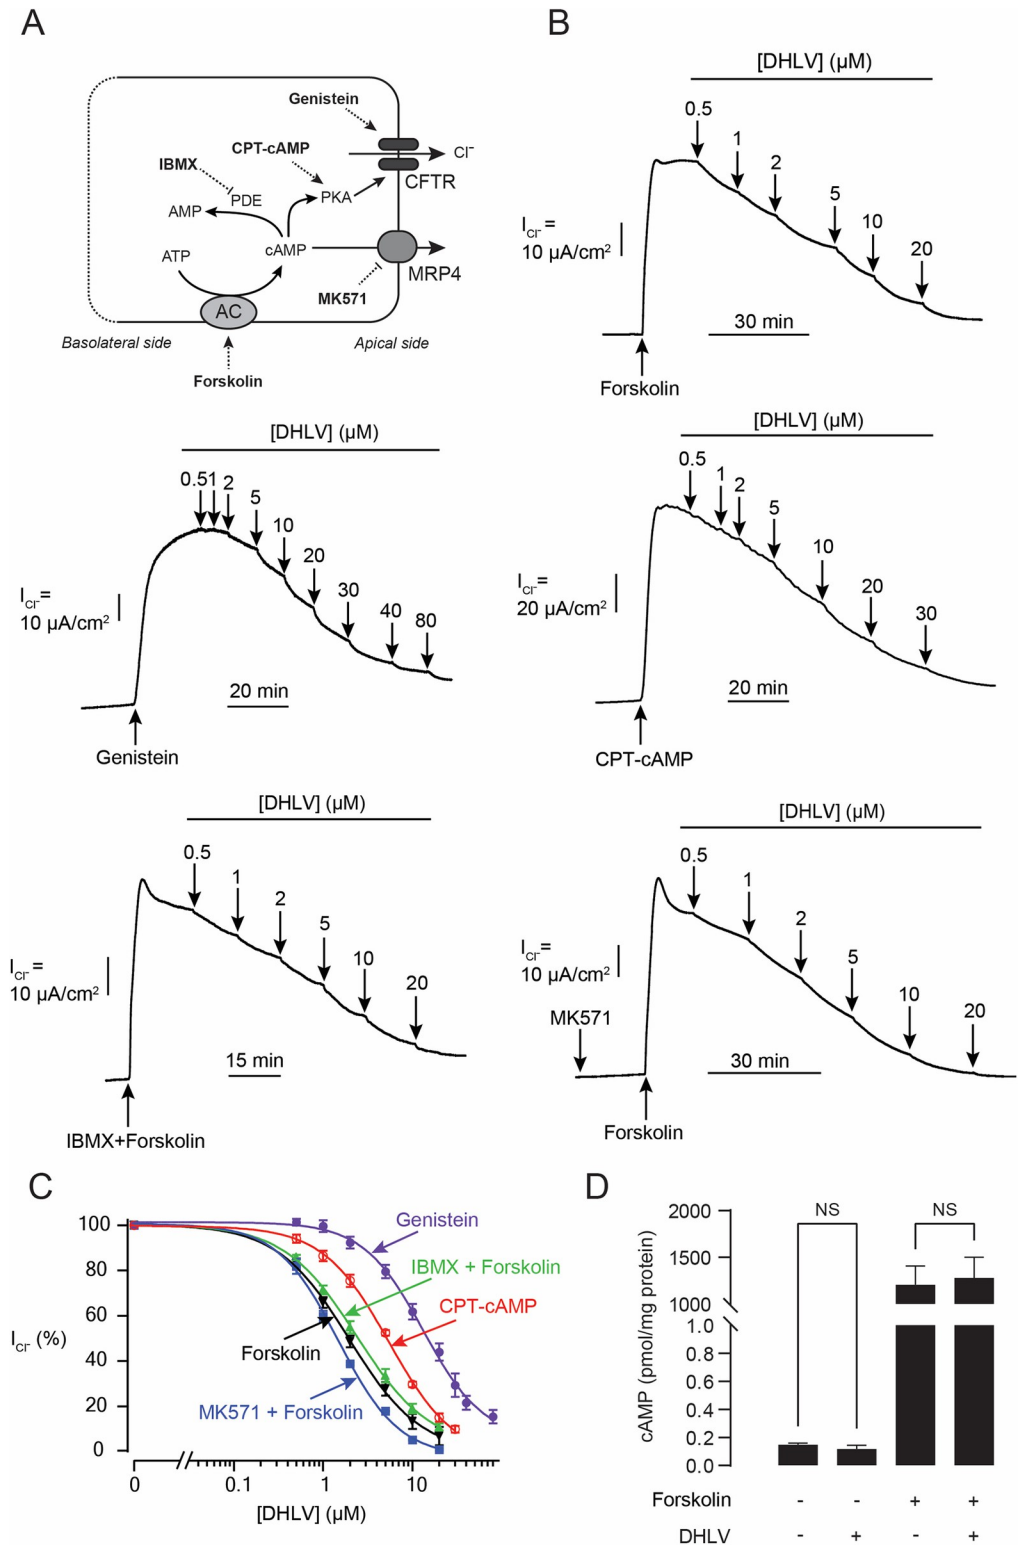

**Fig 4. Mechanism of  $\alpha,\beta$ -dehydrolovastatin (DHLV) actions on cAMP-dependent CFTR activity in intestinal epithelial T84 cell monolayers.** (A) Schematic diagrams showing the regulatory mechanism of CFTR Cl<sup>-</sup> channel activity. (B) Effect of DHLV on cAMP-dependent Cl<sup>-</sup> secretion determined by apical  $I_{Cl}$  analysis induced by forskolin (20  $\mu$ M), genistein (20  $\mu$ M), or CPT-cAMP (100  $\mu$ M). The involvement of phosphodiesterase (PDE) and multidrug-resistance 4 (MRP4) was determined by 15 min pre-treatment with IBMX (1 mM) or MK571 (20  $\mu$ M), respectively,

prior to forskolin treatment. Representative  $I_{SC}$  tracings are shown. (C) Summary of concentration-inhibition studies. Data are fitted to Hill's equation and expressed as means of % agonist-stimulated  $I_{Cl}$   $\pm$  S.E.M. ( $n = 3-7$ ). (D) Effect of DHLV on intracellular cAMP levels. T84 cells were pre-treated with vehicle (control) or DHLV (20  $\mu$ M) for an hour. Intracellular cAMP levels were measured by cAMP parameter assay kits. Data are expressed as concentrations of cAMP  $\pm$  S.E.M. ( $n = 3$ ). NS, non-significant compared with indicated group.

<https://doi.org/10.1371/journal.pntd.0010989.g004>

an  $IC_{50}$  value of  $1.66 \pm 0.32 \mu$ M (Fig 4B and 4C). Furthermore, effects of DHLV on intracellular cAMP levels were investigated. DHLV at a concentration of 20  $\mu$ M did not affect intracellular cAMP levels under both basal and forskolin-stimulated conditions (Fig 4D). All together, these results indicate that the mechanism of CFTR inhibition by DHLV does not involve alteration in intracellular cAMP levels or stimulation of either PDE or MRP4.

Protein phosphatases (PP) and AMP-activated protein kinases (AMPK) are negative regulators of CFTR activity [27,28]. We next asked whether DHLV inhibited CFTR via these two proteins (Fig 5A). We found that pretreatment of T84 cells with  $Na_3VO_4$  and NaF (a cocktail of PP inhibitors) or compound C (AMPK inhibitor) had no effect on  $IC_{50}$  values of DHLV obtained from the dose-response studies using forskolin as a CFTR activator ( $IC_{50}$  values of  $2.71 \pm 0.26 \mu$ M and  $4.45 \pm 0.44 \mu$ M vs  $2.10 \pm 0.25 \mu$ M, respectively) (Fig 5B and 5C). These results indicate that CFTR inhibition by DHLV is independent of AMPK and PP activities.

### 3.4 Effects of DHLV on $Ca^{2+}$ -activated $Cl^-$ channels (CaCC) and basolateral $Na^+/K^+$ ATPases

In addition to CFTR, CaCC provides a principal route for chloride secretion especially in response to elevation of intracellular  $Ca^{2+}$  levels. We next determined effects of DHLV on CaCC in T84 cells using apical  $I_{Cl}$  analyses. In this experiment, CaCC-mediated apical  $I_{Cl}$  was induced by application of ATP following a pretreatment with CFTR<sub>inh</sub>-172, a CFTR inhibitor, to prevent contribution of CFTR [17]. Peak of ATP-induced CaCC-mediated apical  $I_{Cl}$  was significantly reduced by ~75% with the DHLV (20  $\mu$ M) pretreatment (Fig 6A). We also determined the immediate effect of DHLV on intracellular  $Ca^{2+}$  levels using Fluo-8 assay kits. DHLV had no significant effects on both ATP-induced intracellular  $Ca^{2+}$  elevation as analyzed by area under the curve (AUC) (Fig 6B and 6C). These results indicate that mechanisms of CaCC inhibition by DHLV do not involve alteration of intracellular  $Ca^{2+}$  levels. Since basolateral  $Na^+/K^+$  ATPases are important for maintaining driving force of intestinal  $Cl^-$  secretion, we tested whether DHLV affected  $Na^+/K^+$  ATPase activity. In this experiment,  $Na^+$  loading following apical membrane permeabilization stimulated  $Na^+/K^+$  ATPase activity reflected by an increase in  $I_{SC}$ .  $Na^+/K^+$  ATPase activity was quantified from the values of  $I_{SC}$  inhibited by ouabain, an inhibitor of  $Na^+/K^+$  ATPase. As shown in Fig 6D, DHLV (20  $\mu$ M) did not affect ouabain-sensitive  $I_{SC}$ , suggesting that DHLV had no effect on  $Na^+/K^+$  ATPase activity.

### 3.5 Antidiarrheal effect of DHLV in a mouse model of enterotoxin-induced intestinal fluid secretion

Bacterial enterotoxins including cholera toxin (CT) and heat-stable toxin (STa) are major virulence factors responsible for intestinal fluid secretion and fluid loss in secretory diarrheas [5]. To determine potential utility of DHLV in the treatment of secretory diarrheas, effects of DHLV on enterotoxin-induced transepithelial  $Cl^-$  secretion and fluid secretion were determined in T84 cell monolayers and mice, respectively. As depicted in Fig 7A, DHLV inhibited both CT- and STa-induced  $I_{SC}$  in a concentration-dependent manner with >90% inhibition was observed at a concentration of 20  $\mu$ M. To evaluate *in vivo* efficacy of DHLV, ileal closed-loop model of CT-induced fluid secretion was performed in mice. We found that intraluminal

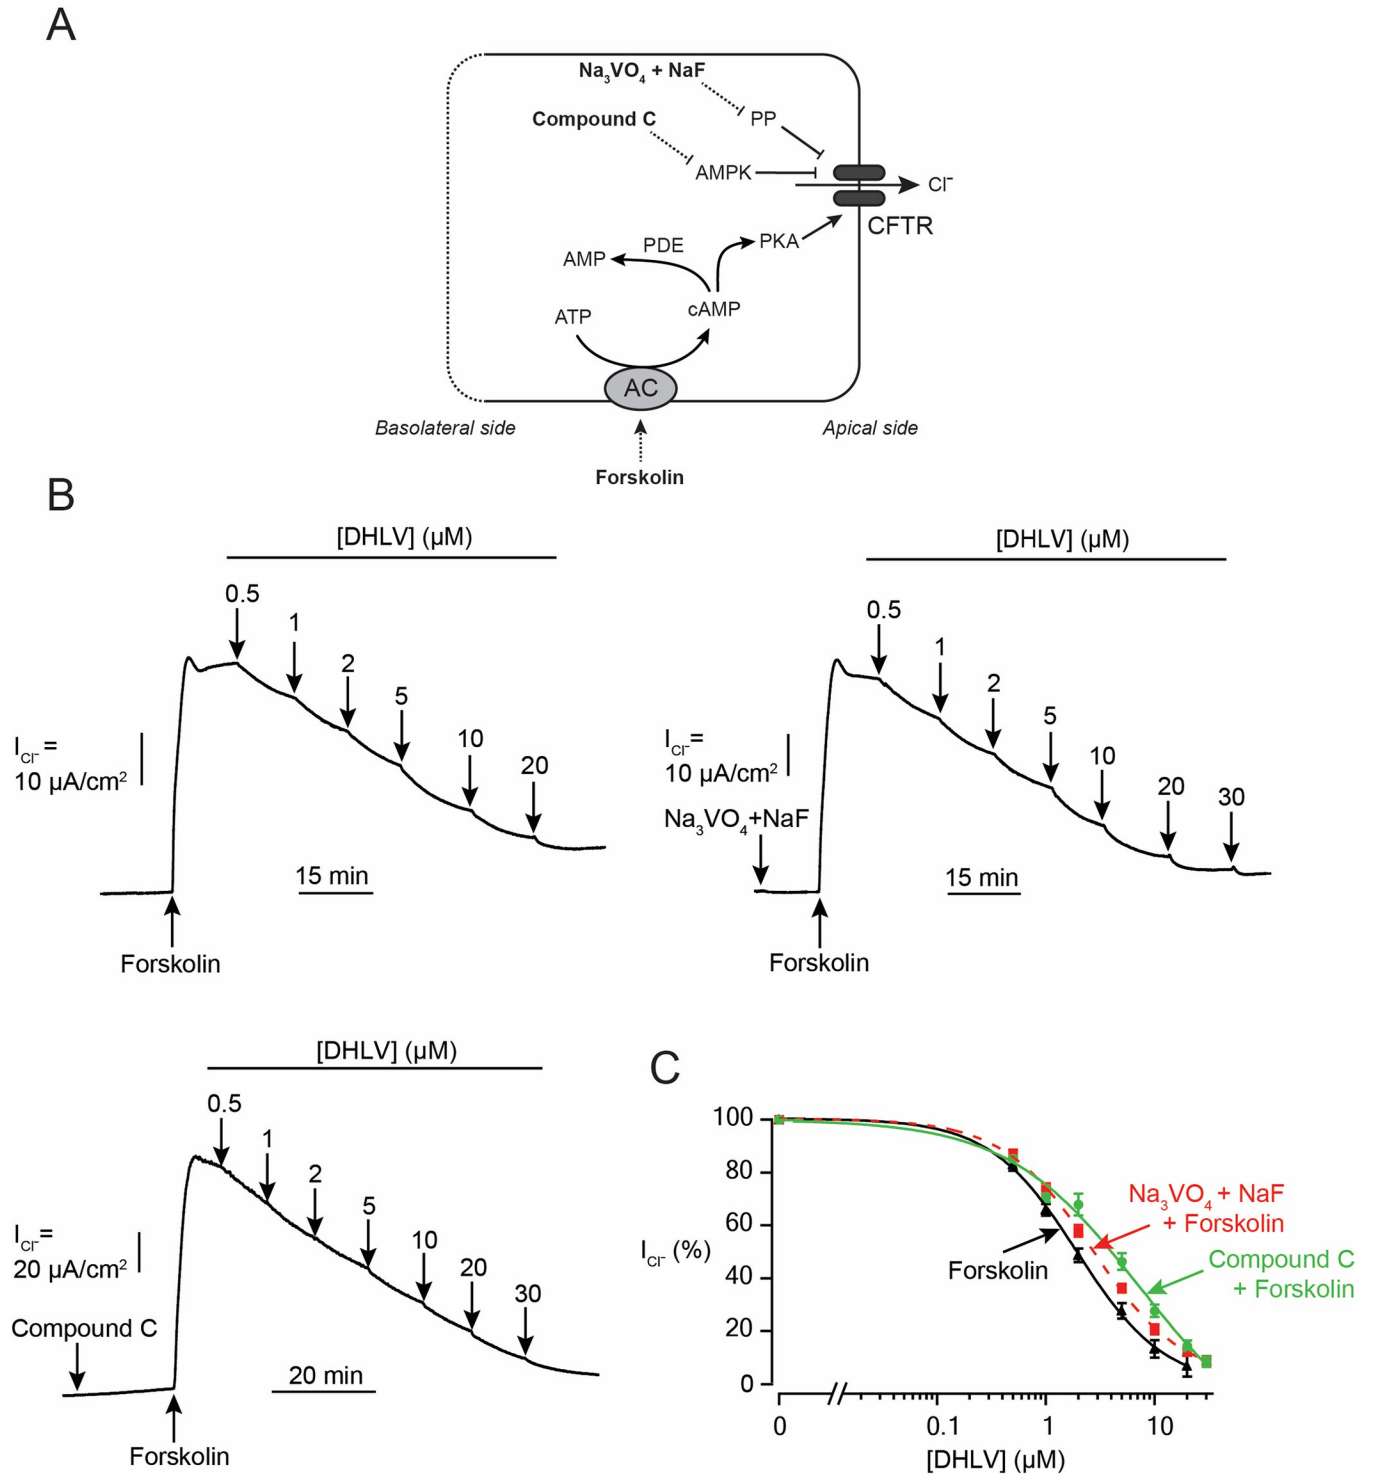

**Fig 5. No involvement of CFTR negative regulators in CFTR inhibition by DHLV.** (A) Schematic diagrams showing the regulatory mechanism of CFTR  $\text{Cl}^-$  channel activity. (B) apical  $\text{Cl}^-$  current ( $I_{\text{Cl}^-}$ ) tracing showing the effect of  $\alpha,\beta$ -dehydrolovastatin (DHLV) on forskolin-induced CFTR  $\text{Cl}^-$  secretion in T84 cells pre-treatment with compound C (50  $\mu\text{M}$ ) or and NaF plus  $\text{Na}_3\text{VO}_4$  (1 mM) for 15 min. (C) Summary of concentration-inhibition studies. Data are fitted to Hill's equation and expressed as means of % agonist-stimulated  $I_{\text{Cl}^-} \pm \text{S.E.M.}$  ( $n = 5-9$ ).

<https://doi.org/10.1371/journal.pntd.0010989.g005>

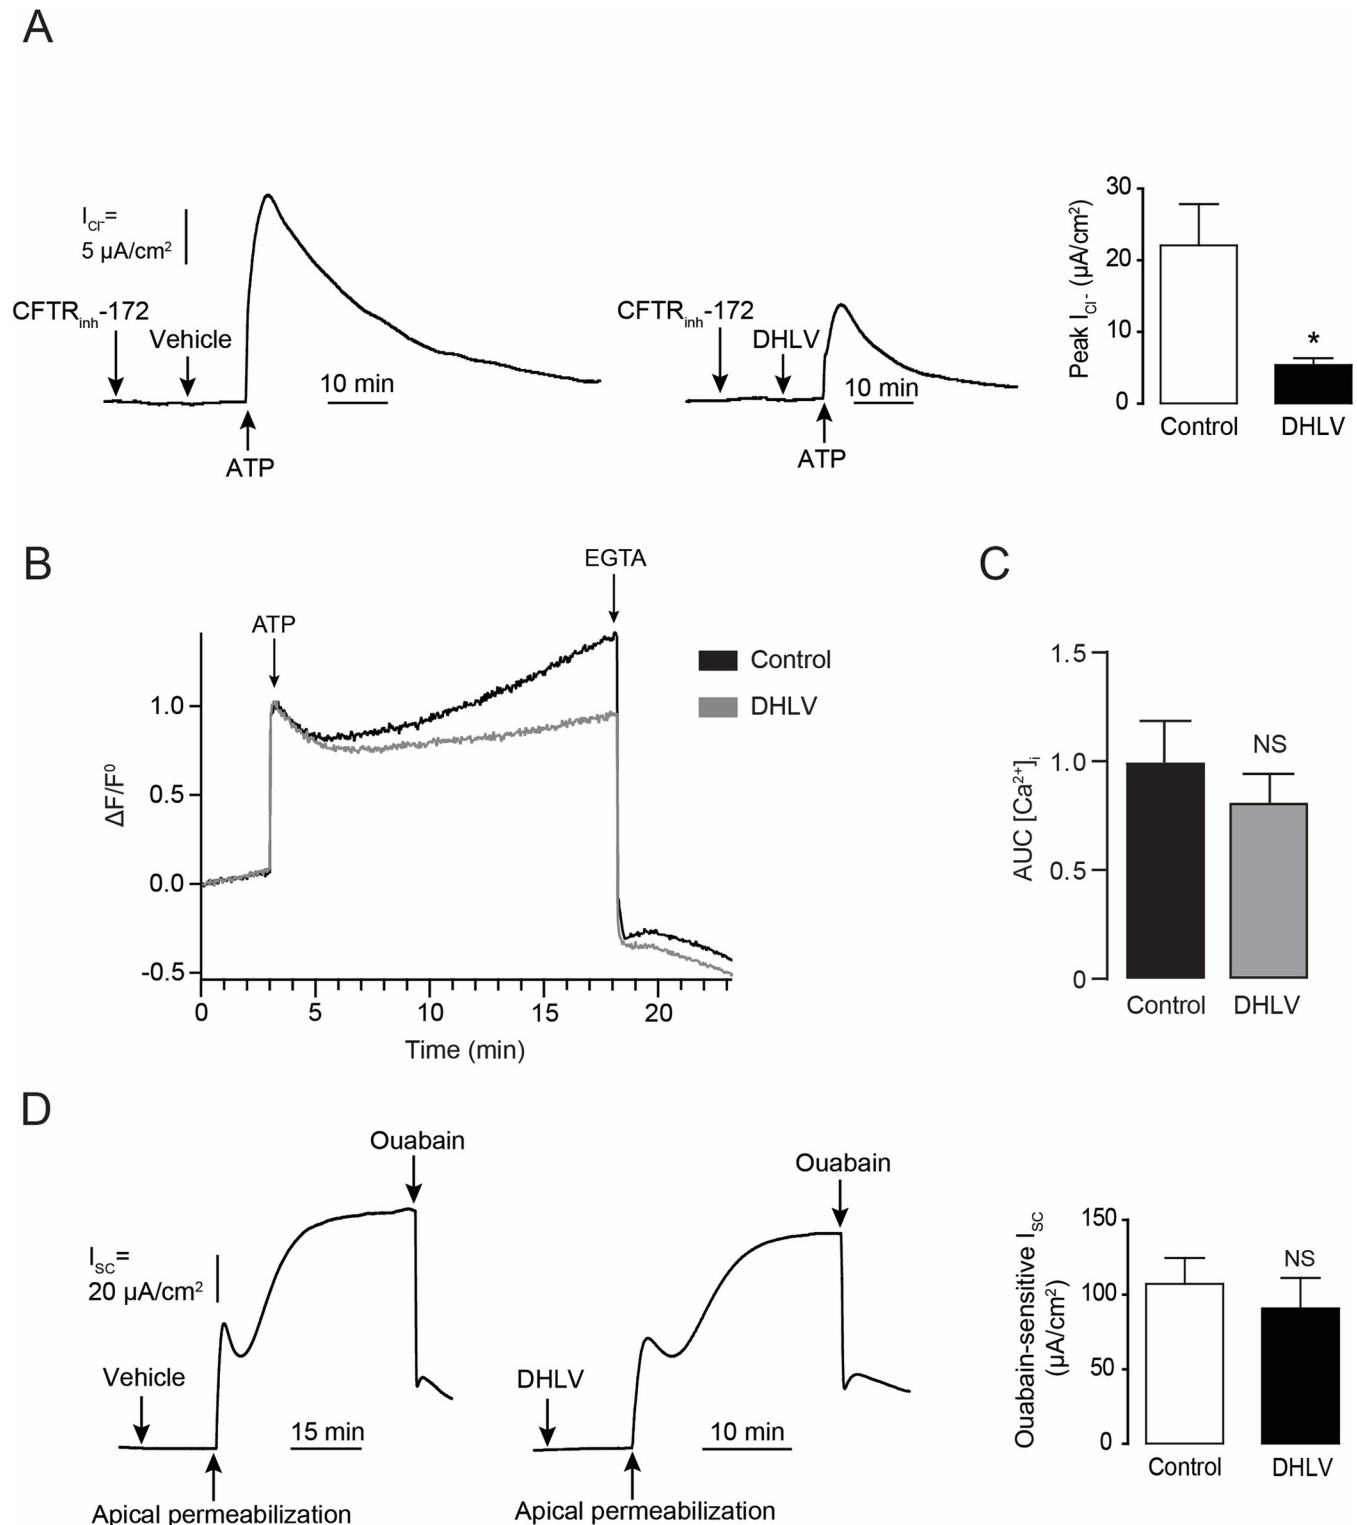

**Fig 6. Effects of  $\alpha,\beta$ -dehydrolovastatin (DHLV) on  $Ca^{2+}$ -activated  $Cl^-$  channels (CaCC), the intracellular  $Ca^{2+}$  levels induced by ATP and  $Na^+/K^+$  ATPases activity.** (A, left) Representative apical  $I_{Cl^-}$  tracing showing the effect of ATP (100  $\mu M$ ) activation after 15 min pre-treatment with CFTR<sub>inh</sub>-172 (5  $\mu M$ ) with vehicle (control) or DHLV (20  $\mu M$ ). (A, right) Summary of the data of peak  $I_{Cl^-}$  expressed as mean of peak  $I_{Cl^-} \pm$  S.E.M. (n = 5). \*  $p < 0.05$  compared with control. Intracellular  $Ca^{2+}$  levels were analyzed from the fluo-8-based fluorescence assays. Fluo-8 fluorescence intensity were measured following vehicle (control) or DHLV (20  $\mu M$ ) together with the addition of ATP (100  $\mu M$ ) and end up with EGTA (3 mM). (B) Representative values of the fractional change in fluorescence intensity relative to baseline ( $\Delta F/F^0$ ) are shown. (C) Summary of total AUC values after baseline correction presented as the

area under the curve (AUC)  $\pm$  S.E.M ( $n = 4$ ). NS, non-significant (Student's  $t$  test). (D, left) Ouabain-sensitive  $I_{SC}$  tracing showing the effect of DHLV on  $Na^+$ - $K^+$  ATPase activity. After T84 cells were permeabilized at apical membrane, ouabain (1 mM) was added. (D, right) Summary of the data are expressed as mean of ouabain-sensitive  $I_{SC} \pm$  S.E.M. ( $n = 4$ ). NS, non-significant (Student's  $t$  test).

<https://doi.org/10.1371/journal.pntd.0010989.g006>

(20  $\mu$ M) and intraperitoneal (2 mg/kg) administrations of DHLV significantly reduced CT-induced fluid secretion analyzed from loop weight/length ratios by  $\sim 65\%$  and  $\sim 59\%$ , respectively (Fig 7B). Furthermore, effects of DHLV on net baseline fluid transport were assessed using ileal closed-loop models in mice. As shown in Fig 7C, at 30 min after instilling PBS into ileal loops, fluid was absorbed by  $\sim 40\%$  as analyzed from the weight/length ratios, which was unaffected by intraluminal administration of DHLV (20  $\mu$ M). These results suggest that DHLV inhibits CT-induced intestinal fluid secretion without affecting net baseline intestinal fluid transport.

#### 4. Discussion

In the present study, we revealed a novel effect of statin derivatives obtained from fungi and in clinical use on inhibiting cAMP-dependent  $Cl^-$  secretion across human intestinal epithelial (T84) cells. Electrophysiological analyses indicate that  $\alpha,\beta$ -dehydrolovastatin (DHLV), a statin derivative from the soil-derived fungus *Aspergillus sclerotiorum* PSU-RSPG178, is the most potent derivative inhibiting CFTR-mediated  $Cl^-$  secretion via mechanisms not involving negative regulators of CFTR functions including AMPK and protein phosphatases, or alteration of intracellular cAMP levels. In addition, CaCC-mediated  $Cl^-$  secretion was inhibited by DHLV. Importantly, DHLV attenuated diarrheal severity by suppressing intestinal fluid secretion in the mouse model of CT-induced diarrhea without affecting basal intestinal fluid transport.

Based on the observation that the addition of DHLV into apical solutions produced the maximal inhibition of cAMP-dependent  $Cl^-$  secretion, whereas addition of DHLV into basolateral solutions partially reduced cAMP-dependent  $Cl^-$  secretion, indicating that DHLV targeted CFTR at the apical membrane of T84 cells. Of note, pharmacokinetic profile of DHLV is not currently available. It is possible that DHLV may be transported across the cellular membrane via active transport. Indeed, absorption of some statins (i.e., pravastatin) was reported to be transported into intracellular sites of small intestine via the organic anion transporting polypeptide (OATP-B), which is located on apical membrane [29]. Therefore, it is possible that DHLV might also be transported via OATP-B into intestinal epithelial cells, which accounts for apical polarity of DHLV's effect.

MTT assays indicate that DHLV has no cytotoxic effect on T84 cells. In addition to serving as a physical barrier, tight junction-dependent intestinal barrier function establishes cell polarity, which is known to support vectoral transport across intestinal epithelial cells [30–32]. FITC-dextran (4 kDa) permeability assays indicate that intestinal barrier function is not affected by DHLV treatment. Moreover, DHLV did not inhibit  $Na^+$ - $K^+$  ATPase activity, which is required for the regulation of intracellular  $Na^+$  and cell volume in intestinal epithelial cells [33,34]. Based on our findings, CFTR-inhibiting effect of DHLV is not associated with overt toxicity to intestinal epithelial cells, which is one of prerequisite properties of an antidiarrheal therapy [35].

The inhibitory effect of DHLV on CFTR-mediated  $Cl^-$  secretion induced by forskolin was more potent than that induced by genistein. Tyrosine kinases and protein phosphatases are known to regulate the activity of CFTR chloride channel by phosphorylation and dephosphorylation at nucleotide-binding domains 1 and 2 (NBD1 and NBD2), respectively [36,37]. Genistein stimulates CFTR directly by interacting with CFTR and indirectly by inhibiting tyrosine kinases and protein phosphatases [38]. Therefore, we speculate that the reduction of DHLV

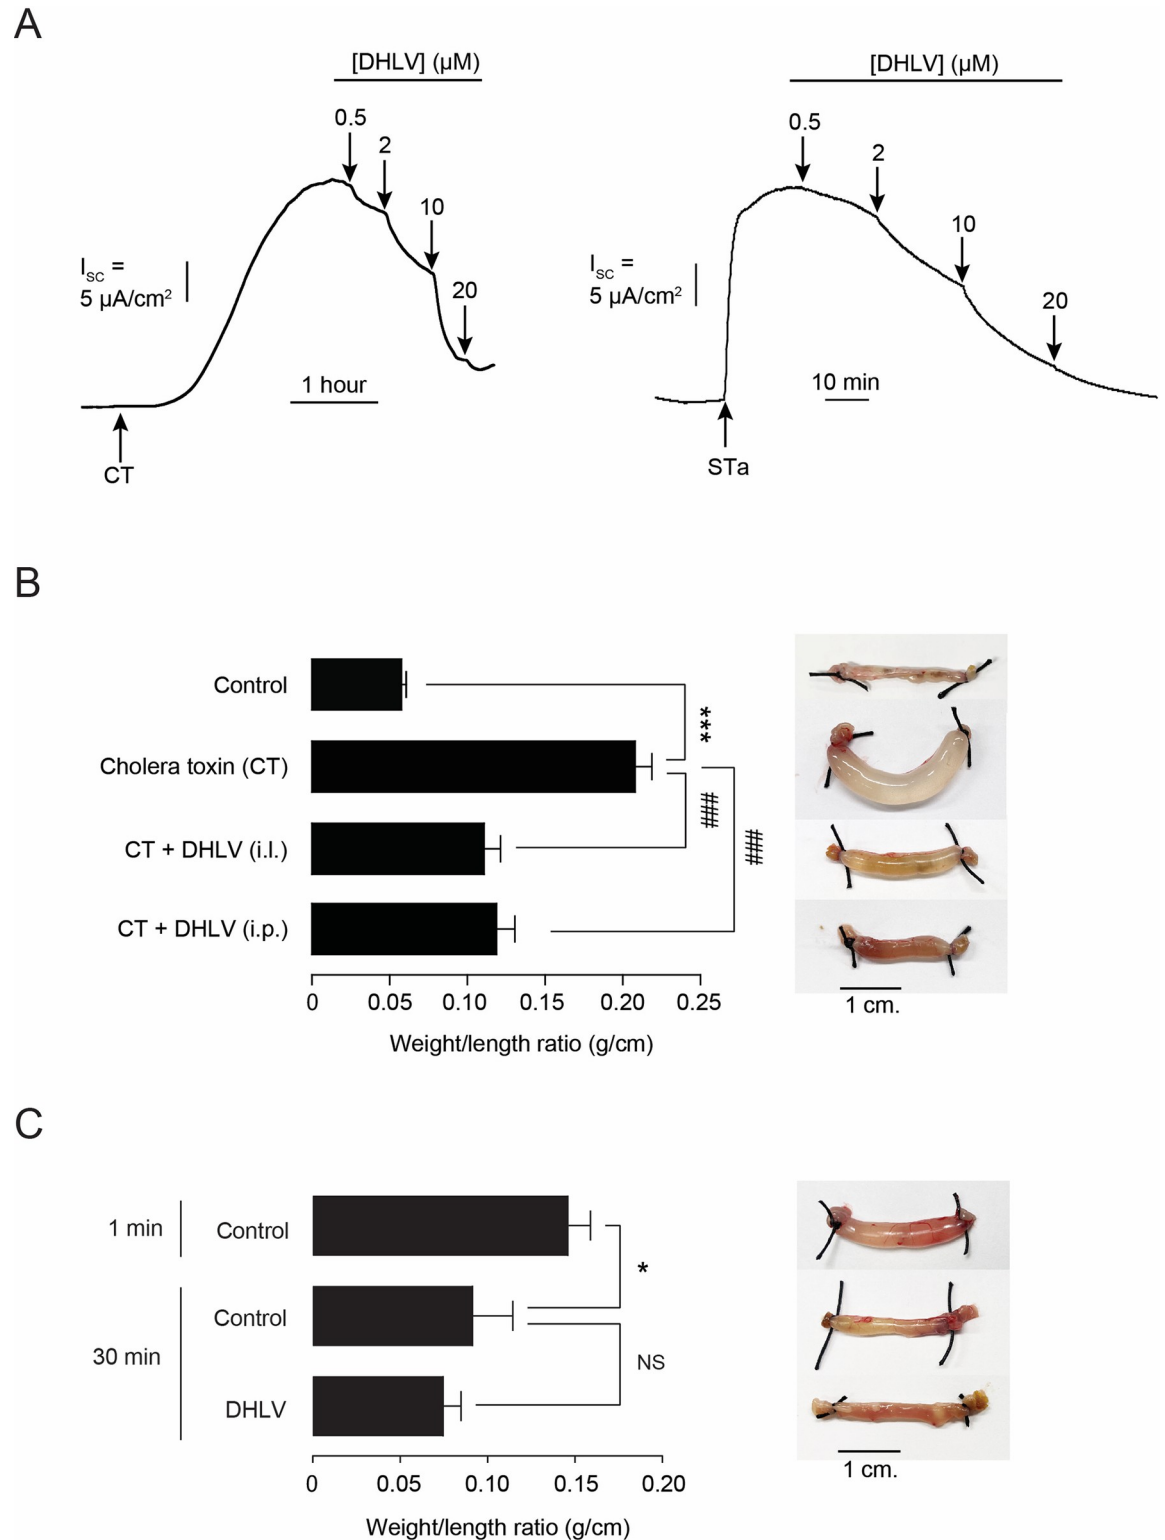

**Fig 7. Potential utility of  $\alpha,\beta$ -dehydrolovastatin (DHLV) as an anti-diarrheal agent for secretory diarrheas.** (A) Effect of DHLV on cholera toxin (CT)- and heat-stable toxin (STa)-stimulated  $\text{Cl}^-$  secretion in T84 cell monolayers determined by  $I_{sc}$  analysis. After apical addition of CT (1  $\mu\text{g}/\text{ml}$ ) or STa (100  $\mu\text{M}$ ) to stimulate the increasing of  $I_{sc}$ , DHLV was added in both apical and basolateral solution. Representative  $I_{sc}$  tracings are shown. (B) Effect of DHLV on CT-induced intestinal fluid secretion determined by ileal closed-loop weight/length ratios. Ileal closed-loops were injected with PBS (control) or PBS containing CT ( $\mu\text{g}/\text{loop}$ ) with or without intraluminal

(i.l.) and intraperitoneal (i.p.) administrations of DHLV (20  $\mu$ M and 2 mg/kg, respectively). Representative photographs of ileal loops are shown. Summary of data are expressed as means of ileal closed-loop weight/length ratio  $\pm$  S.E.M. ( $n = 5-6$ ). \*\*\*  $p < 0.001$  compared with control; ###  $p < 0.001$  compared with CT-treated group (one-way ANOVA). (C) Effect of DHLV on the net intestinal fluid transport determined by ileal closed-loop weight/length ratios. Ileal closed-loop were injected with PBS (200  $\mu$ l) with or without intraluminal administrations of DHLV (20  $\mu$ M). After 30 min, ileal closed-loop weight/length ratio were measured. Representative photographs of ileal closed-loops are shown. Summary of data are expressed as means of ileal closed-loop weight/length ratio  $\pm$  S.E.M. ( $n = 6-7$ ). \*  $p < 0.05$  compared with control at 1 min; NS, non-significant compared with control at the same time point (one-way ANOVA).

<https://doi.org/10.1371/journal.pntd.0010989.g007>

potency in inhibiting genistein-induced CFTR-mediated  $\text{Cl}^-$  secretion may be due to the reduced potency of DHLV to inhibit CFTR activity induced by tyrosine kinase and/or protein phosphatase inhibition.

Overproduction of cAMP is stimulated by CT through stimulation of a signaling cascade involving adenylyl cyclase and protein kinase A (PKA), which stimulates intestinal fluid secretion and accounts for pathogenesis of secretory diarrheas [39]. In addition, inhibition of PDE or MRP4, the regulators of intracellular cAMP levels, leads to stimulation of transepithelial  $\text{Cl}^-$  secretion and causes secretory diarrheas [26,40]. It is possible that DHLV decreases the levels of cAMP, which results in inhibition of CFTR-mediated  $\text{Cl}^-$  secretion [41]. However, our results showed that DHLV inhibited CFTR activity without the contribution of PDE and MRP4. In addition, DHLV had no effect on the intracellular cAMP levels. Therefore, we speculate that mechanisms of CFTR inhibition by DHLV may result from its direct actions on CFTR channel activity or its indirect actions on other proteins regulating CFTR function.

AMPK has been reported to inhibit CFTR activity and limit cAMP-dependent  $\text{Cl}^-$  secretion, which effectively decreases intestinal fluid secretion in acute diarrheal illness [42,43]. This regulatory role of AMPK is supported by the evidence showing that AMPK activation is involved in the anti-secretory mechanism of some natural compounds [16]. However, we found that pretreatment with AMPK inhibitor did not alter the inhibitory effect of DHLV on CFTR activity. In fact, statins were reported to rapidly activate AMPK via increased Thr-172 phosphorylation in vascular endothelial cells [44]. Since other mechanisms may contribute to the action of DHLV, we further investigated whether protein phosphatases, another negative regulator of CFTR activity, are a target of DHLV action. Protein phosphatases are able to dephosphorylates R domain of CFTR and cause deactivation of CFTR [27]. Indeed, our findings showed that pretreatment with protein phosphatase inhibitors did not affect the ability of DHLV to inhibit CFTR activity, suggesting that protein phosphatases are not involved in the inhibitory effect of DHLV on CFTR function.

It is accepted that important properties of potential anti-diarrheal therapy include *in vivo* anti-diarrheal efficacy and no interference on intestinal fluid absorption [45]. Indeed, DHLV inhibits both CFTR and CaCC-mediated  $\text{Cl}^-$  secretion, implying that DHLV may be beneficial in the treatment of secretory diarrheas caused by stimulation of either cAMP or  $\text{Ca}^{2+}$ . *In vitro* studies using CT and STa toxins as activators of  $\text{Cl}^-$  secretion in T84 cells showed that DHLV effectively inhibited prosecretory effects of both toxins. Since STa induces CFTR-mediated  $\text{Cl}^-$  secretion via a cGMP-dependent mechanism [46], DHLV appears to inhibit intestinal  $\text{Cl}^-$  secretion elicited by three main second messengers. It is noteworthy that anti-secretory efficacy of DHLV given via intraperitoneal (2 mg/kg) or intraluminal (20  $\mu$ M) route in mice is  $\sim 59.30\%$  and  $\sim 64.64\%$ , respectively. At the baseline condition, measurement of fluid transport showed that DHLV had no effect on net intestinal fluid transport in mice. This dose (2 mg/kg) of DHLV is equivalent to 0.16 mg/kg in humans, which is in the dose range of statin drugs in the treatment of dyslipidemia [47]. The route of medication depends on the drug's properties [48]. Based on our findings in mice in this study, it is possible that DHLV exerts

their anti-secretory action in diarrheal patients via intraluminal administration route, which is easier to apply and associated with potentially less systemic side effects or toxicities compared to intravenous administration [48]. Our results indicate that DHLV inhibits intestinal fluid secretion by inhibiting CFTR and CaCC channels. Limitation of this study include the lacking of investigations on effects of DHLV on other transporters involved in intestinal fluid transport and pharmacokinetics and safety profiles of DHLV, which warrants further studies.

## 5. Conclusion

In summary,  $\alpha,\beta$ -dehydrolovastatin (DHLV) and other statins represent a novel class of inhibitors of intestinal apical Cl<sup>-</sup> channels including CFTR and CaCC, which are involved in the pathogenesis of severe diarrheas including cholera. Although oral rehydration therapy is highly effective, there is no drug therapy approved for cholera aside from broad spectrum antibiotics. Further research and development on DHLV may lead to the successful development of inexpensive and effective treatment of cholera.

## Author Contributions

**Conceptualization:** Chatchai Muanprasat.

**Formal analysis:** Rattikarn Noitem.

**Funding acquisition:** Vatcharin Rukachaisirikul, Chatchai Muanprasat.

**Investigation:** Rattikarn Noitem, Pawin Pongkorpsakol, Chatchai Muanprasat.

**Methodology:** Rattikarn Noitem, Chatchai Changsen.

**Project administration:** Chatchai Muanprasat.

**Resources:** Yaowapa Sukpondma, Chittreeya Tansakul, Vatcharin Rukachaisirikul, Chatchai Muanprasat.

**Supervision:** Chatchai Muanprasat.

**Validation:** Chatchai Muanprasat.

**Visualization:** Chatchai Muanprasat.

**Writing – original draft:** Rattikarn Noitem, Vatcharin Rukachaisirikul, Chatchai Muanprasat.

**Writing – review & editing:** Chatchai Muanprasat.

## References

1. Dadonaite B, Ritchie H, Roser M. Diarrheal diseases: Our World in Data; 2018 [cited 2022 Aug 4]. Available from: <https://ourworldindata.org/diarrheal-diseases>.
2. Muanprasat C, Chatsudthipong V. Cholera: pathophysiology and emerging therapeutic targets. *Future Med Chem*. 2013; 5(7):781–98. Epub 2013/05/09. <https://doi.org/10.4155/fmc.13.42> PMID: 23651092.
3. World Health Organization. The treatment of diarrhoea: a manual for physicians and other senior health workers. Geneva: World Health Organization; 2005. p. 1–44.
4. Das S, Jayaratne R, Barrett KE. The Role of Ion Transporters in the Pathophysiology of Infectious Diarrhea. *Cell Mol Gastroenterol Hepatol*. 2018; 6(1):33–45. Epub 2018/06/22. <https://doi.org/10.1016/j.jcmgh.2018.02.009> PMID: 29928670; PubMed Central PMCID: PMC6007821.
5. Thiagarajah JR, Donowitz M, Verkman AS. Secretory diarrhoea: mechanisms and emerging therapies. *Nat Rev Gastroenterol Hepatol*. 2015; 12(8):446–57. Epub 2015/07/01. <https://doi.org/10.1038/nrgastro.2015.111> PMID: 26122478; PubMed Central PMCID: PMC4786374.

6. Field M. Intestinal ion transport and the pathophysiology of diarrhea. *J Clin Invest*. 2003; 111(7):931–43. Epub 2003/04/03. <https://doi.org/10.1172/JCI18326> PMID: 12671039; PubMed Central PMCID: PMC152597.
7. Gabriel SE, Brigman KN, Koller BH, Boucher RC, Stutts MJ. Cystic fibrosis heterozygote resistance to cholera toxin in the cystic fibrosis mouse model. *Science*. 1994; 266(5182):107–9. Epub 1994/10/07. <https://doi.org/10.1126/science.7524148> PMID: 7524148.
8. Sawasvirojwong S, Sriramanote P, Chatsudthipong V, Muanprasat C. An Adult Mouse Model of *Vibrio cholerae*-induced Diarrhea for Studying Pathogenesis and Potential Therapy of Cholera. *PLoS Negl Trop Dis*. 2013; 7(6):e2293. Epub 2013/07/05. <https://doi.org/10.1371/journal.pntd.0002293> PMID: 23826402; PubMed Central PMCID: PMC3694821.
9. Preston P, Wartosch L, Gunzel D, Fromm M, Kongsuphol P, Ousingsawat J, et al. Disruption of the K<sup>+</sup> channel beta-subunit KCNE3 reveals an important role in intestinal and tracheal Cl<sup>-</sup> transport. *J Biol Chem*. 2010; 285(10):7165–75. Epub 2010/01/07. <https://doi.org/10.1074/jbc.M109.047829> PMID: 20051516; PubMed Central PMCID: PMC2844166.
10. Vallon V, Grahmmer F, Volk H, Sandu CD, Richter K, Rexhepaj R, et al. KCNQ1-dependent transport in renal and gastrointestinal epithelia. *Proc Natl Acad Sci U S A*. 2005; 102(49):17864–9. Epub 2005/11/30. <https://doi.org/10.1073/pnas.0505860102> PMID: 16314573; PubMed Central PMCID: PMC1308898.
11. Barrett KE, Keely SJ. Chloride secretion by the intestinal epithelium: molecular basis and regulatory aspects. *Annu Rev Physiol*. 2000; 62:535–72. Epub 2000/06/09. <https://doi.org/10.1146/annurev.physiol.62.1.535> PMID: 10845102.
12. Newman DJ, Cragg GM. Natural Products as Sources of New Drugs from 1981 to 2014. *J Nat Prod*. 2016; 79(3):629–61. Epub 2016/02/09. <https://doi.org/10.1021/acs.jnatprod.5b01055> PMID: 26852623.
13. Luerang W, Khammee T, Kumpum W, Suksamrarn S, Chatsudthipong V, Muanprasat C. Hydroxyxanthone as an inhibitor of cAMP-activated apical chloride channel in human intestinal epithelial cell. *Life Sci*. 2012; 90(25–26):988–94. Epub 2012/05/29. <https://doi.org/10.1016/j.lfs.2012.05.001> PMID: 22634581.
14. Wongsamitkul N, Sirianant L, Muanprasat C, Chatsudthipong V. A plant-derived hydrolysable tannin inhibits CFTR chloride channel: a potential treatment of diarrhea. *Pharm Res*. 2010; 27(3):490–7. Epub 2010/03/13. <https://doi.org/10.1007/s11095-009-0040-y> PMID: 20225391.
15. Schuier M, Sies H, Illek B, Fischer H. Cocoa-related flavonoids inhibit CFTR-mediated chloride transport across T84 human colon epithelia. *J Nutr*. 2005; 135(10):2320–5. Epub 2005/09/24. <https://doi.org/10.1093/jn/135.10.2320> PMID: 16177189.
16. Yibcharoenporn C, Chusuth P, Jakakul C, Rungrotmongkol T, Chavasiri W, Muanprasat C. Discovery of a novel chalcone derivative inhibiting CFTR chloride channel via AMPK activation and its anti-diarrheal application. *J Pharmacol Sci*. 2019; 140(3):273–83. Epub 2019/08/25. <https://doi.org/10.1016/j.jphs.2019.07.012> PMID: 31444000.
17. Pongkorsakol P, Wongkrasant P, Kumpun S, Chatsudthipong V, Muanprasat C. Inhibition of intestinal chloride secretion by piperine as a cellular basis for the anti-secretory effect of black peppers. *Pharmacol Res*. 2015; 100:271–80. Epub 2015/08/25. <https://doi.org/10.1016/j.phrs.2015.08.012> PMID: 26297981.
18. Akrimajirachote N, Satitsri S, Sommart U, Rukachaisirikul V, Muanprasat C. Inhibition of CFTR-mediated intestinal chloride secretion by a fungus-derived arthropolide A: Mechanism of action and anti-diarrheal efficacy. *Eur J Pharmacol*. 2020; 885:173393. Epub 2020/07/28. <https://doi.org/10.1016/j.ejphar.2020.173393> PMID: 32712094.
19. Muangnil P, Satitsri S, Tadpetch K, Saparpakorn P, Chatsudthipong V, Hannongbua S, et al. A fungal metabolite zearalenone as a CFTR inhibitor and potential therapy of secretory diarrheas. *Biochem Pharmacol*. 2018; 150:293–304. Epub 2018/02/24. <https://doi.org/10.1016/j.bcp.2018.02.024> PMID: 29475061.
20. Berdy J. Bioactive microbial metabolites. *J Antibiot (Tokyo)*. 2005; 58(1):1–26. Epub 2005/04/09. <https://doi.org/10.1038/ja.2005.1> PMID: 15813176.
21. Demain AL, Sanchez S. Microbial drug discovery: 80 years of progress. *J Antibiot (Tokyo)*. 2009; 62(1):5–16. Epub 2009/01/10. <https://doi.org/10.1038/ja.2008.16> PMID: 19132062; PubMed Central PMCID: PMC7094699.
22. Jadon KS, Singh SK, Pathak R. Chapter 1—Potentials of metabolites of soil fungi. In: Singh J, Gehlot P, editors. *New and Future Developments in Microbial Biotechnology and Bioengineering*: Elsevier; 2020. p. 1–9.
23. Phainuphong P, Rukachaisirikul V, Saithong S, Phongpaichit S, Bowornwiriyan K, Muanprasat C, et al. Lovastatin Analogues from the Soil-Derived Fungus *Aspergillus sclerotiorum* PSU-RSPG178. *J*

- Nat Prod. 2016; 79(6):1500–7. Epub 2016/05/27. <https://doi.org/10.1021/acs.jnatprod.5b00961> PMID: 27228159.
24. Choi EY, Kim EC, Oh HM, Kim S, Lee HJ, Cho EY, et al. Iron chelator triggers inflammatory signals in human intestinal epithelial cells: involvement of p38 and extracellular signal-regulated kinase signaling pathways. *J Immunol.* 2004; 172(11):7069–77. Epub 2004/05/22. <https://doi.org/10.4049/jimmunol.172.11.7069> PMID: 15153529.
  25. Moonwiryakit A, Koval M, Muanprasat C. Pharmacological stimulation of G-protein coupled receptor 40 alleviates cytokine-induced epithelial barrier disruption in airway epithelial Calu-3 cells. *Int Immunopharmacol.* 2019; 73:353–61. Epub 2019/05/28. <https://doi.org/10.1016/j.intimp.2019.05.026> PMID: 31129422; PubMed Central PMCID: PMC6620115.
  26. Moon C, Zhang W, Ren A, Arora K, Sinha C, Yarlagadda S, et al. Compartmentalized accumulation of cAMP near complexes of multidrug resistance protein 4 (MRP4) and cystic fibrosis transmembrane conductance regulator (CFTR) contributes to drug-induced diarrhea. *J Biol Chem.* 2015; 290(18):11246–57. Epub 2015/03/13. <https://doi.org/10.1074/jbc.M114.605410> PMID: 25762723; PubMed Central PMCID: PMC4416832.
  27. Luo J, Pato MD, Riordan JR, Hanrahan JW. Differential regulation of single CFTR channels by PP2C, PP2A, and other phosphatases. *Am J Physiol.* 1998; 274(5):C1397–410. Epub 1998/06/05. <https://doi.org/10.1152/ajpcell.1998.274.5.C1397> PMID: 9612228.
  28. Hallows KR, Kobinger GP, Wilson JM, Witters LA, Foskett JK. Physiological modulation of CFTR activity by AMP-activated protein kinase in polarized T84 cells. *Am J Physiol Cell Physiol.* 2003; 284(5):C1297–308. Epub 2003/01/10. <https://doi.org/10.1152/ajpcell.00227.2002> PMID: 12519745.
  29. Kobayashi D, Nozawa T, Imai K, Nezu J, Tsuji A, Tamai I. Involvement of human organic anion transporting polypeptide OATP-B (SLC21A9) in pH-dependent transport across intestinal apical membrane. *J Pharmacol Exp Ther.* 2003; 306(2):703–8. Epub 2003/05/02. <https://doi.org/10.1124/jpet.103.051300> PMID: 12724351.
  30. Odenwald MA, Turner JR. The intestinal epithelial barrier: a therapeutic target? *Nat Rev Gastroenterol Hepatol.* 2017; 14(1):9–21. Epub 2016/11/17. <https://doi.org/10.1038/nrgastro.2016.169> PMID: 27848962; PubMed Central PMCID: PMC5554468.
  31. Shen L, Weber CR, Raleigh DR, Yu D, Turner JR. Tight junction pore and leak pathways: a dynamic duo. *Annu Rev Physiol.* 2011; 73:283–309. Epub 2010/10/13. <https://doi.org/10.1146/annurev-physiol-012110-142150> PMID: 20936941; PubMed Central PMCID: PMC4655434.
  32. Rodriguez-Boulan E, Nelson WJ. Morphogenesis of the polarized epithelial cell phenotype. *Science.* 1989; 245(4919):718–25. Epub 1989/08/18. <https://doi.org/10.1126/science.2672330> PMID: 2672330.
  33. Rajasekaran SA, Palmer LG, Moon SY, Peralta Soler A, Apodaca GL, Harper JF, et al. Na,K-ATPase activity is required for formation of tight junctions, desmosomes, and induction of polarity in epithelial cells. *Mol Biol Cell.* 2001; 12(12):3717–32. Epub 2001/12/12. <https://doi.org/10.1091/mbc.12.12.3717> PMID: 11739775; PubMed Central PMCID: PMC60750.
  34. Sugi K, Musch MW, Field M, Chang EB. Inhibition of Na<sup>+</sup>,K<sup>+</sup>-ATPase by interferon gamma down-regulates intestinal epithelial transport and barrier function. *Gastroenterology.* 2001; 120(6):1393–403. Epub 2001/04/21. <https://doi.org/10.1053/gast.2001.24045> PMID: 11313309.
  35. Hoque KM, Chakraborty S, Sheikh IA, Woodward OM. New advances in the pathophysiology of intestinal ion transport and barrier function in diarrhea and the impact on therapy. *Expert Review of Anti-infective Therapy.* 2012; 10(6):687–99. <https://doi.org/10.1586/eri.12.47> PMID: 22734958
  36. Illek B, Fischer H, Santos GF, Widdicombe JH, Machen TE, Reenstra WW. cAMP-independent activation of CFTR Cl channels by the tyrosine kinase inhibitor genistein. *Am J Physiol.* 1995; 268(4 Pt 1):C886–93. Epub 1995/04/01. <https://doi.org/10.1152/ajpcell.1995.268.4.C886> PMID: 7537452.
  37. Reenstra WW, Yurko-Mauro K, Dam A, Raman S, Shorten S. CFTR chloride channel activation by genistein: the role of serine/threonine protein phosphatases. *Am J Physiol.* 1996; 271(2 Pt 1):C650–7. Epub 1996/08/01. <https://doi.org/10.1152/ajpcell.1996.271.2.C650> PMID: 8770006.
  38. Sheppard DN, Welsh MJ. Structure and function of the CFTR chloride channel. *Physiol Rev.* 1999; 79(1 Suppl):S23–45. Epub 1999/01/29. <https://doi.org/10.1152/physrev.1999.79.1.S23> PMID: 9922375.
  39. Gill RK, Hecht GA. Chapter 64—Host-Pathogen Interactions in Pathophysiology of Diarrheal Disorders. In: Said HM, editor. *Physiology of the Gastrointestinal Tract (Sixth Edition)*: Academic Press; 2018. p. 1547–77.
  40. O’Grady SM, Jiang X, Maniak PJ, Birmachu W, Scribner LR, Bulbulian B, et al. Cyclic AMP-dependent Cl secretion is regulated by multiple phosphodiesterase subtypes in human colonic epithelial cells. *J Membr Biol.* 2002; 185(2):137–44. Epub 2002/03/14. <https://doi.org/10.1007/s00232-001-0120-3> PMID: 11891572.
  41. Li C, Dandridge KS, Di A, Marrs KL, Harris EL, Roy K, et al. Lysophosphatidic acid inhibits cholera toxin-induced secretory diarrhea through CFTR-dependent protein interactions. *J Exp Med.* 2005; 202

- (7):975–86. Epub 2005/10/06. <https://doi.org/10.1084/jem.20050421> PMID: 16203867; PubMed Central PMCID: PMC2213164.
42. Rogers AC, Huetter L, Hoekstra N, Collins D, Collaco A, Baird AW, et al. Activation of AMPK inhibits cholera toxin stimulated chloride secretion in human and murine intestine. *PLoS One*. 2013; 8(7): e69050. Epub 2013/08/13. <https://doi.org/10.1371/journal.pone.0069050> PMID: 23935921; PubMed Central PMCID: PMC3728293.
  43. Hallows KR. Emerging role of AMP-activated protein kinase in coupling membrane transport to cellular metabolism. *Curr Opin Nephrol Hypertens*. 2005; 14(5):464–71. Epub 2005/07/28. <https://doi.org/10.1097/01.mnh.0000174145.14798.64> PMID: 16046906.
  44. Sun W, Lee TS, Zhu M, Gu C, Wang Y, Zhu Y, et al. Statins activate AMP-activated protein kinase in vitro and in vivo. *Circulation*. 2006; 114(24):2655–62. Epub 2006/11/23. <https://doi.org/10.1161/CIRCULATIONAHA.106.630194> PMID: 17116771.
  45. Faure C. Role of antidiarrhoeal drugs as adjunctive therapies for acute diarrhoea in children. *Int J Pediatr*. 2013; 2013:612403. Epub 2013/03/28. <https://doi.org/10.1155/2013/612403> PMID: 23533446; PubMed Central PMCID: PMC3603675.
  46. Hodges K, Gill R. Infectious diarrhea: Cellular and molecular mechanisms. *Gut Microbes*. 2010; 1(1):4–21. Epub 2011/02/18. <https://doi.org/10.4161/gmic.1.1.11036> PMID: 21327112; PubMed Central PMCID: PMC3035144.
  47. Grundy SM, Stone NJ, Bailey AL, Beam C, Birtcher KK, Blumenthal RS. 2018 Guideline on the Management of Blood Cholesterol. 2018.
  48. Kim J, De Jesus O. Medication Routes of Administration. *StatPearls*. Treasure Island (FL)2022.
